# Supplementary material for: Research on the quantum confinement effect and enhanced luminescence of red-emitting P5+-doped CaAl12O19:Mn4+,Mg2+ phosphors
Source: Royal Society of Chemistry journal article supplement (doi:10.1039/d1dt02009a), 2021-01-01
Supplement: d1dt02009a1.pdf [file d1dt02009a1.pdf]

## Supplementary Information

### Research on Quantum Confinement Effect and Enhanced Luminescence of Red-emitting Phosphors $P^{5+}$ -doped $CaAl_2O_9:Mn^{4+},Mg^{2+}$

Guodong Fan,<sup>\*a,b</sup> Han Zhang,<sup>a,b</sup> Di Fan,<sup>c,d</sup> Rui Jiang,<sup>e</sup> Fangyi Ruan,<sup>a,b</sup> Nan Li,<sup>a,b</sup> and Xiaoyan Su<sup>a,b</sup>

<sup>a</sup>College of Chemistry and Chemical Engineering, Shaanxi University of Science & Technology, Xi'an 710021, P. R. China

<sup>b</sup>Key Laboratory of Auxiliary Chemistry & Technology for Chemical Industry, Ministry of Education, Shaanxi University of Science & Technology, Xi'an 710021, P. R. China

<sup>c</sup>Department of Information Engineering, Shaanxi Polytechnic Institute, Xianyang 712000, P. R. China

<sup>d</sup>Department of Electronic and Electrical Engineering, University of Sheffield, Sheffield S10 2TN, UK

<sup>e</sup>College of Geosciences, China University of Petroleum, Beijing, Changping 102249, P. R. China

\*Corresponding author e-mail: fangd@sust.edu.cn

**Table S1.** Rietveld Refinement Data and Crystallographic Parameter of  $\text{CaAl}_{12-m}\text{P}_m\text{O}_{19+m}:0.01\text{Mn}^{4+},0.2\text{Mg}^{2+}$  ( $m=0-0.15$ ) phosphors.

| Formula               | m=0            | m=0.02         | m=0.04         | m=0.07         | m=0.10         | m=0.13         | m=0.15         |
|-----------------------|----------------|----------------|----------------|----------------|----------------|----------------|----------------|
| cryst syst            | Hexagon        |
| 2 $\theta$ range(deg) | 5-80           | 5-80           | 5-80           | 5-80           | 5-80           | 5-80           | 5-80           |
| space group           | <i>P63/mmc</i> |
| a=b (Å)               | 5.566          | 5.562          | 5.561          | 5.561          | 5.560          | 5.560          | 5.559          |
| c (Å)                 | 21.925         | 21.904         | 21.907         | 21.904         | 21.899         | 21.900         | 21.899         |
| $\alpha=\beta$ (deg)  | 90             | 90             | 90             | 90             | 90             | 90             | 90             |
| $\gamma$ (deg)        | 120            | 120            | 120            | 120            | 120            | 120            | 120            |
| V (Å <sup>3</sup> )   | 588.34         | 586.82         | 586.6          | 586.6          | 586.22         | 586.33         | 586.18         |
| R <sub>wp</sub> (%)   | 9.26           | 9.58           | 9.86           | 9.57           | 9.83           | 9.62           | 9.95           |
| R <sub>p</sub> (%)    | 6.89           | 7.25           | 7.63           | 7.22           | 7.31           | 7.28           | 7.84           |
| Z                     | 2              | 2              | 2              | 2              | 2              | 2              | 2              |
| $\chi^2$              | 2.358          | 2.671          | 2.264          | 3.027          | 2.951          | 2.587          | 2.216          |

**Table S2.** Ionic radii difference percentage ( $D_r$ ) between host cations and doped ions.

| Ions             | Coordination |          | $D_r/\%$               |                        |                        |                         |
|------------------|--------------|----------|------------------------|------------------------|------------------------|-------------------------|
|                  | number       | Radius/Å | $\text{Ca}^{2+}$ 1.34* | $\text{Al}^{3+}$ 0.39* | $\text{Al}^{3+}$ 0.48* | $\text{Al}^{3+}$ 0.535* |
|                  | (CN)         |          | (CN = 12)              | (CN = 4)               | (CN = 5)               | (CN = 6)                |
| $\text{Mn}^{4+}$ | 6            | 0.53     | /                      | -35.90                 | -10.41                 | 0.93                    |
| $\text{Mn}^{2+}$ | 6            | 0.67     | /                      | -71.79                 | -39.58                 | -25.23                  |
| $\text{Mg}^{2+}$ | 4            | 0.57     | /                      | -41.65                 | -18.75                 | -6.54                   |
| $\text{Mg}^{2+}$ | 6            | 0.72     |                        | -84.62                 | -50.00                 | -34.58                  |
| $\text{P}^{5+}$  | 4            | 0.38     |                        | 2.56                   | 20.83                  | 28.97                   |

\* Ionic radius. “/” refers to no mention in the literature.

**Table S3.** Wyckoff positions, atomic coordinates and occupancy for  $\text{CaAl}_{11.90}\text{P}_{0.1}\text{O}_{19.10}:0.01\text{Mn}^{4+},0.2\text{Mg}^{2+}$ .

| Atom | Wyck. | x      | y      | z       | Occ.   |
|------|-------|--------|--------|---------|--------|
| Ca1  | 2d    | 0.6667 | 0.3333 | 0.2500  | 1.0    |
| Al1  | 2a    | 0      | 0      | 0       | 1.0    |
| Al2  | 4e    | 0      | 0      | 0.2891  | 0.1854 |
| P1   | 4e    | 0      | 0      | 0.2891  | 0.3146 |
| Al3  | 4f    | 0.3333 | 0.6667 | 0.0281  | 1.0    |
| Al4  | 4f    | 0.3333 | 0.6667 | 0.1910  | 1.0    |
| Al5  | 12k   | 0.1686 | 0.3371 | -0.1091 | 1.0    |
| O1   | 4e    | 0      | 0      | 0.1491  | 1.0    |
| O2   | 4f    | 0.6667 | 0.3333 | 0.0546  | 1.0    |
| O3   | 6h    | 0.1811 | 0.3621 | 0.2500  | 1.0    |
| O4   | 12k   | 0.1551 | 0.3101 | 0.0521  | 1.0    |
| O5   | 12k   | 0.5033 | 1.0065 | 0.1491  | 1.0    |

**Table S4.** P site occupancy of  $\text{CaAl}_{12-m}\text{P}_m\text{O}_{19+m} \cdot 0.01\text{Mn}^{4+}, 0.2\text{Mg}^{2+}$  ( $m=0.02-0.15$ ).

| Atom \ Occ. | m = 0.02 | m = 0.04 | m = 0.07 | m = 0.10 | m = 0.13 | m = 0.15 |
|-------------|----------|----------|----------|----------|----------|----------|
|             |          |          |          |          |          |          |
| Al2         | 0.3931   | 0.3392   | 0.2605   | 0.1854   | 0.1999   | 0.2086   |
| P1          | 0.1069   | 0.1608   | 0.2395   | 0.3146   | 0.3001   | 0.2914   |

\* P site occupancy+Al (2) site occupancy=0.5000

**Table S5.** The fluorescence lifetime, CIE and PLQY of  $\text{CaAl}_{12-m}\text{P}_m\text{O}_{19+m}:\text{0.01Mn}^{4+},\text{0.2Mg}^{2+}$  ( $m=0\text{--}0.15$ ) phosphors.

| Sample | CIE (chromaticity       |        | $\tau$ (ms) | PLQY (%) |
|--------|-------------------------|--------|-------------|----------|
|        | coordinates)            |        |             |          |
|        | under 396 nm excitation |        |             |          |
|        | x                       | y      |             |          |
| m=0    | 0.6438                  | 0.3549 | 0.9165      | 9.8      |
| m=0.02 | 0.7191                  | 0.2809 | 0.9514      | 30.7     |
| m=0.04 | 0.7191                  | 0.2808 | 0.9529      | 32.8     |
| m=0.07 | 0.7190                  | 0.2809 | 0.9543      | 41.2     |
| m=0.10 | 0.7193                  | 0.2807 | 0.9567      | 70.2     |
| m=0.13 | 0.7191                  | 0.2808 | 0.9526      | 41.6     |
| m=0.15 | 0.7192                  | 0.2808 | 0.9316      | 38.9     |

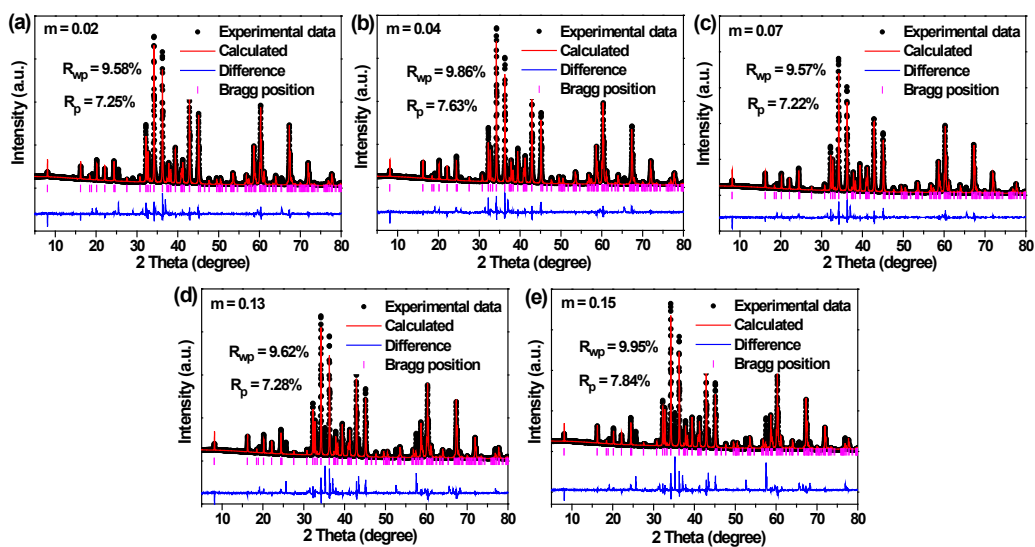

**Fig. S1** XRD Rietveld refinement results of  $\text{CaAl}_{12-m}\text{P}_m\text{O}_{19+m}:0.01\text{Mn}^{4+},0.2\text{Mg}^{2+}$  ( $m=0.02, 0.04, 0.07, 0.13, 0.15$ ) phosphors. (a)  $m=0.02$ , (b)  $m=0.04$ , (c)  $m=0.07$ , (d)  $m=0.13$ , (e)  $m=0.15$ .

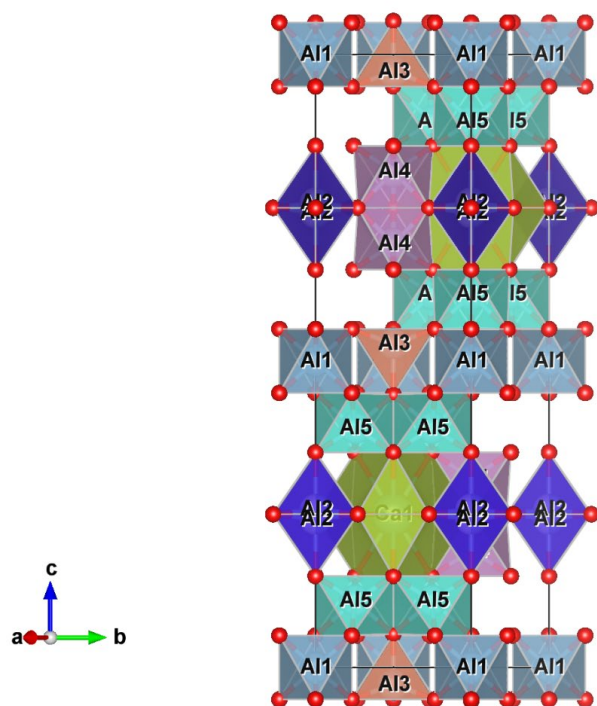

**Fig. S2** Crystal structure of  $\text{CaAl}_{12}\text{O}_{19}$  (hexagonal,  $P6_3/mmc$ ).

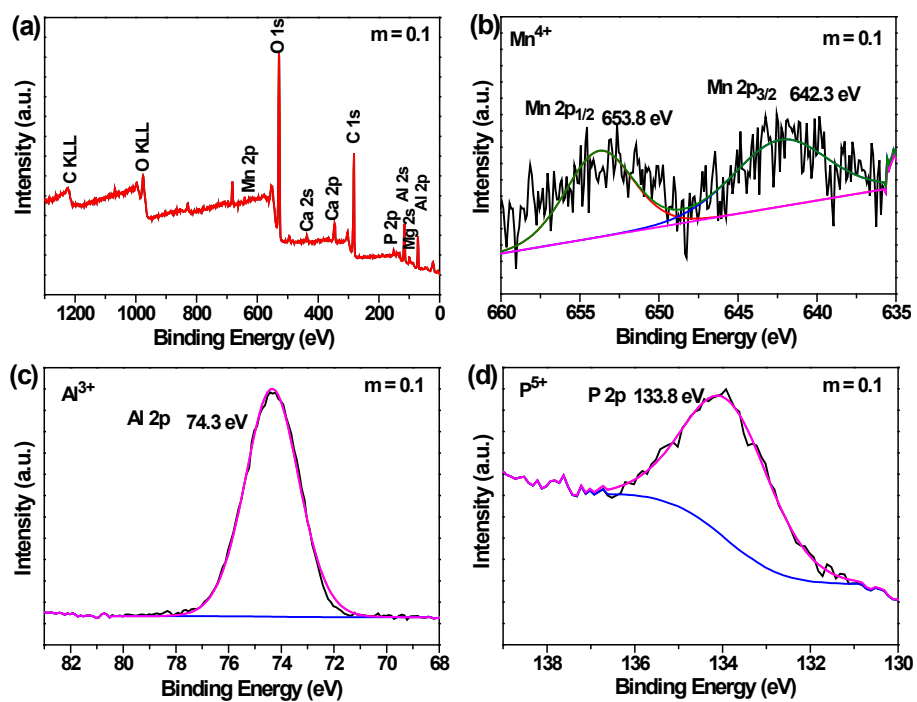

**Fig. S3** XPS spectra of  $\text{CaAl}_{11.90}\text{P}_{0.1}\text{O}_{19.10}:0.01\text{Mn}^{4+}, 0.2\text{Mg}^{2+}$  (a) survey, (b) Mn 2p, (c) Al 2p and (d) P 2p.

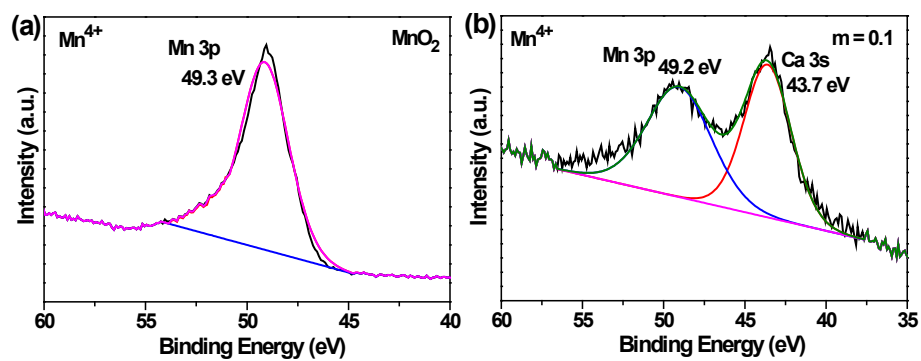

**Fig. S4** Mn 3p of  $\text{MnO}_2$  and  $\text{CaAl}_{11.90}\text{P}_{0.1}\text{O}_{19.10}:0.01\text{Mn}^{4+}, 0.2\text{Mg}^{2+}$ .

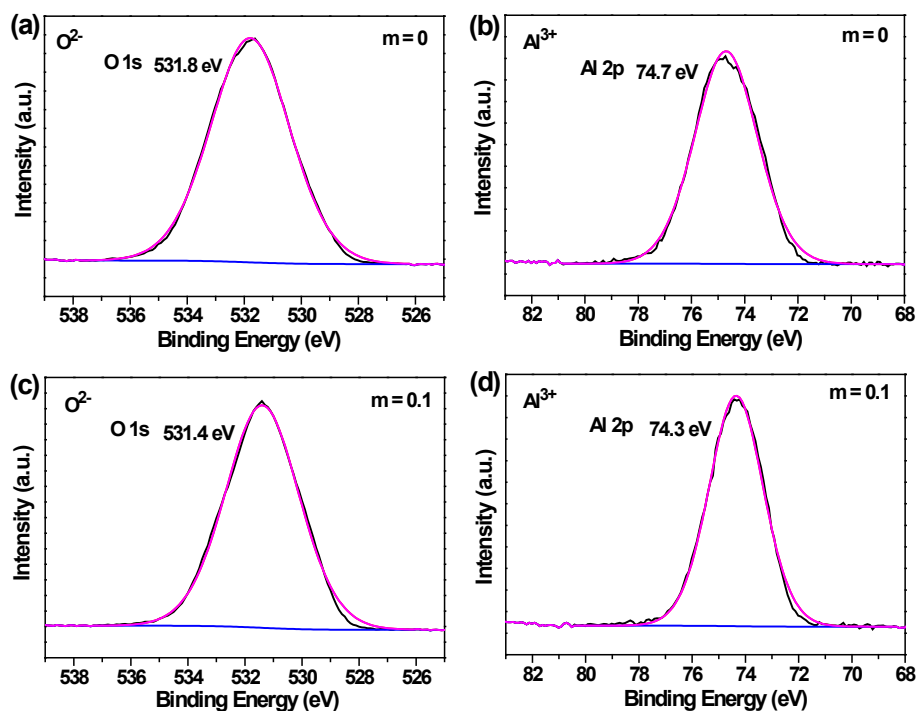

**Fig. S5** XPS spectra of  $\text{CaAl}_{12}\text{O}_{19}:0.01\text{Mn}^{4+},0.2\text{Mg}^{2+}$  phosphor (a) Al 2p and (b) O 1s and  $\text{CaAl}_{11.90}\text{P}_{0.1}\text{O}_{19.10}:0.01\text{Mn}^{4+},0.2\text{Mg}^{2+}$  phosphor (c) Al 2p and (d) O 1s.

In the  $\text{CaAl}_{12}\text{O}_{19}:0.01\text{Mn}^{4+},0.2\text{Mg}^{2+}$  ( $m=0$ ) and  $\text{CaAl}_{11.90}\text{P}_{0.1}\text{O}_{19.10}:0.01\text{Mn}^{4+},0.2\text{Mg}^{2+}$  ( $m=0.1$ ) phosphors, the binding energy of Al 2p orbital and O 1s orbital are located at 74.70 eV, 74.33 eV and 531.79 eV, 531.39 eV, respectively. Compared with the undoped  $\text{P}^{5+}$ , it is found that when the doping amount of  $\text{P}^{5+}$  is 0.1, the peak of O 1s moved  $\sim 0.4$  eV towards the low binding energy. Combined with the analysis of crystal structure of the sample, it shows that there is a shallow electron trap caused by oxygen vacancies in  $\text{CaAl}_{11.90}\text{P}_{0.1}\text{O}_{19.10}:0.01\text{Mn}^{4+},0.2\text{Mg}^{2+}$  ( $m=0.1$ ) phosphor, which can confine photo-generated electrons in the traps, resulting in an increase in the electron cloud density, thereby causing a decrease in the binding energy of electrons. Therefore, we speculate that the existence of oxygen vacancies and electron traps is extremely important to improve the luminescence performance of phosphors.

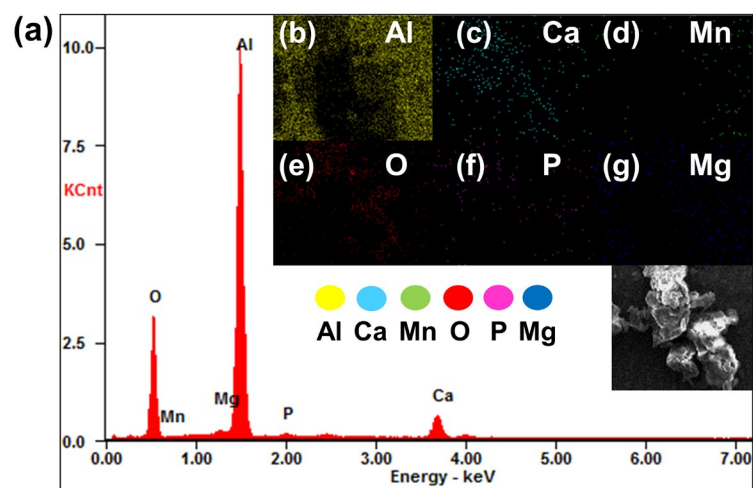

**Fig. S6** The EDS spectrum and element mapping images of  $\text{CaAl}_{11.90}\text{P}_{0.1}\text{O}_{19.10}:0.01\text{Mn}^{4+},0.2\text{Mg}^{2+}$  phosphor.

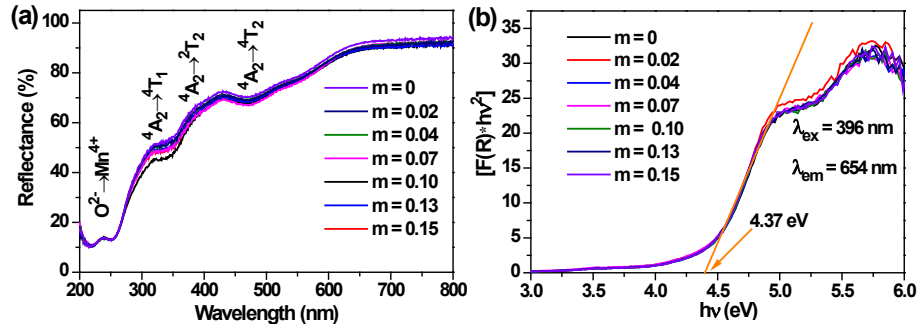

**Fig. S7** (a) Diffuse reflectance spectra of  $\text{CaAl}_{12-m}\text{P}_m\text{O}_{19+m}:0.01\text{Mn}^{4+},0.2\text{Mg}^{2+}$  ( $m=0-0.15$ ) phosphors. (b) Relationship of  $[F(R)hv]^2$  versus photon energy  $h\nu$  in  $\text{CaAl}_{12-m}\text{P}_m\text{O}_{19+m}:0.01\text{Mn}^{4+},0.2\text{Mg}^{2+}$  ( $m=0-0.15$ ) phosphors.

The diffuse reflectance spectrum of  $\text{CaAl}_{12-m}\text{P}_m\text{O}_{19+m}:0.01\text{Mn}^{4+},0.2\text{Mg}^{2+}$  ( $m=0-0.15$ ) phosphors with different  $\text{PO}_4^{3-}$  concentrations are depicted in Fig. S7a. Obviously, As the content of  $\text{PO}_4^{3-}$  increases, the reflection rate decreases slightly, phosphors begin to absorb light from 600nm, and strong light absorption is observed in the n-ultraviolet (n-UV) region in the range of 200–350 nm, which is attributed to the charge transfer transition of  $\text{O}^{2-} \rightarrow \text{Mn}^{4+}$  (CTB). Furthermore, the energy bands between 300–400 nm and 430–500 nm are attributed to the  $^4\text{A}_{2g} \rightarrow ^4\text{T}_{1g}$ ,  $^4\text{A}_{2g} \rightarrow ^2\text{T}_{2g}$  and  $^4\text{A}_{2g} \rightarrow ^4\text{T}_{2g}$  transitions of  $\text{Mn}^{4+}$ , respectively. The band gap energy can be obtained by the Tauc-Plot method:<sup>1</sup>

$$[F(R)hv]^n = A(h\nu - E_g) \quad (1)$$

where  $F(R)$  is the absorption coefficient,  $R$  is the reflectance coefficient,  $h\nu$  is the photon energy,  $A$  represents the absorption constant, and  $E_g$  is the optical band gap value.  $n = 1/2$  and 2 correspond to the direct band gap and the indirect band gap, respectively. According to the calculation of the electronic structure,  $\text{CaAl}_{12}\text{O}_{19}$  is a direct band gap semiconductor, so  $n = 1/2$ . Fig. S7b displays the relationship between  $[F(R)hv]^2$  and  $h\nu$ . The band gap values of  $\text{CaAl}_{11.90}\text{P}_{0.10}\text{O}_{19.10}:0.01\text{Mn}^{4+},0.2\text{Mg}^{2+}$  phosphors remains unchanged with the increase of  $\text{PO}_4^{3-}$  content, indicating that the addition of  $\text{PO}_4^{3-}$  only enhances the crystal field without changing the band structure.



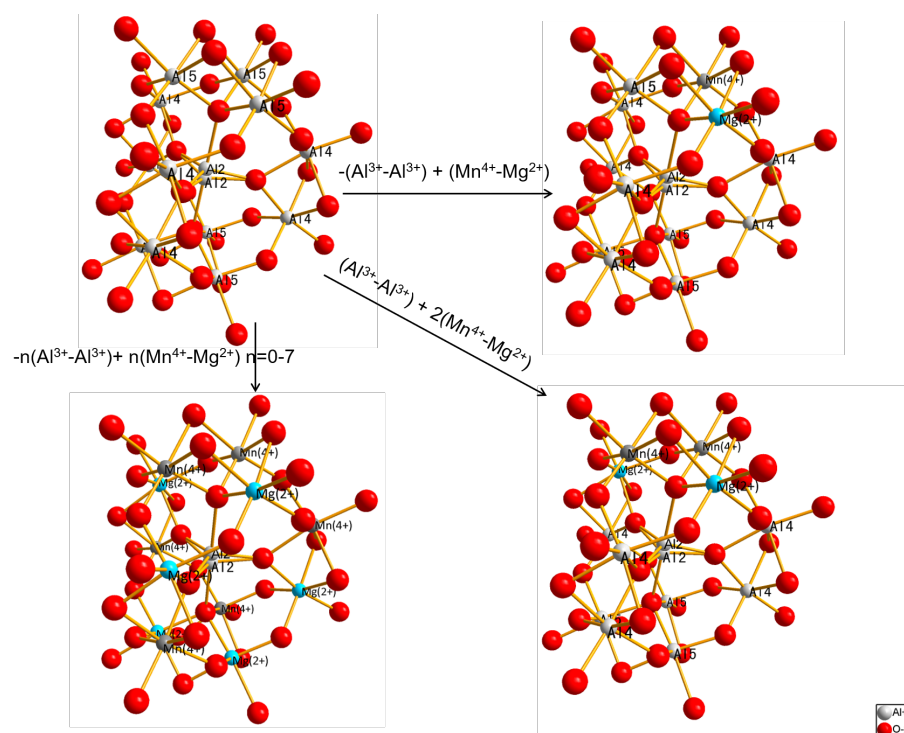

**Fig. S9** The substitution process of ion pairs in the crystal structure.

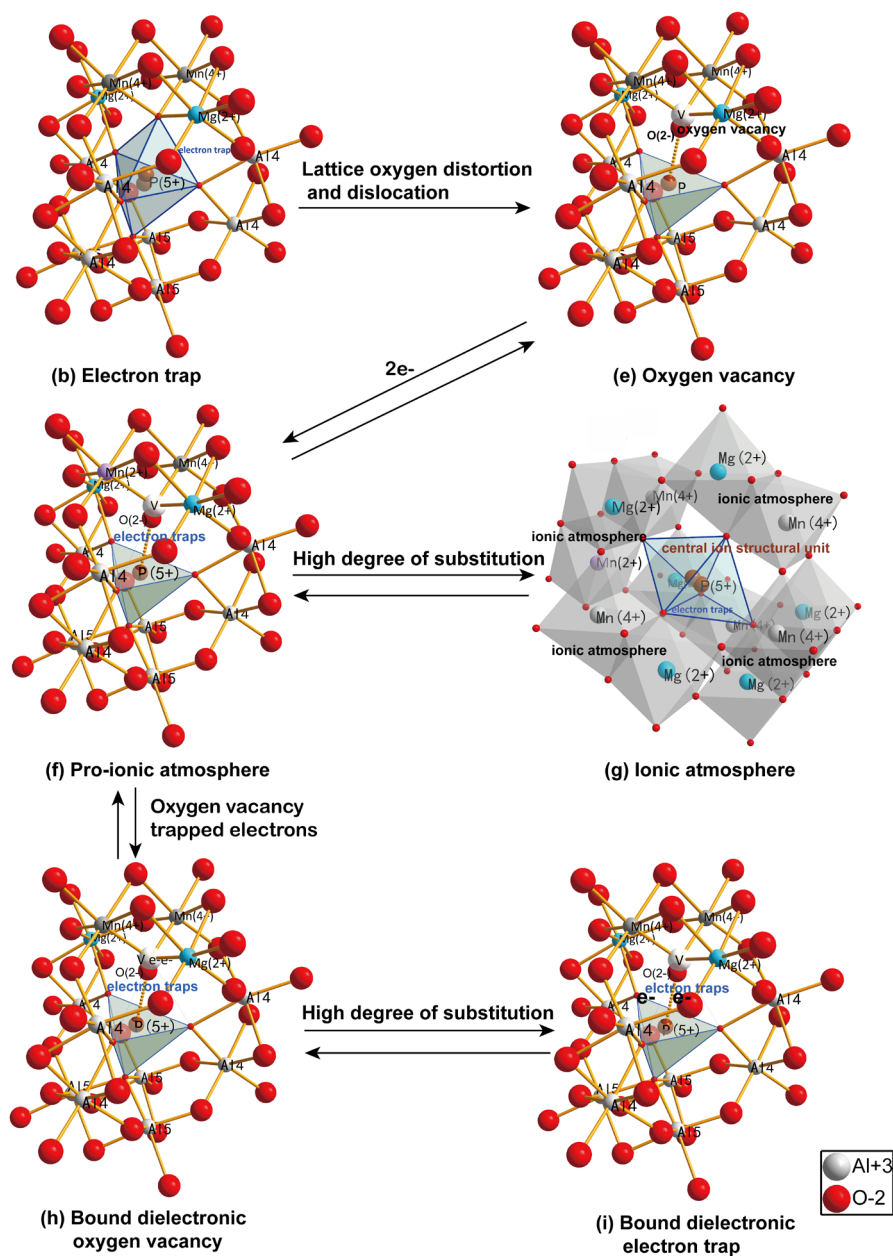

**Fig. S10** The formation of oxygen vacancy and ionic atmosphere, and their binding state of electrons.

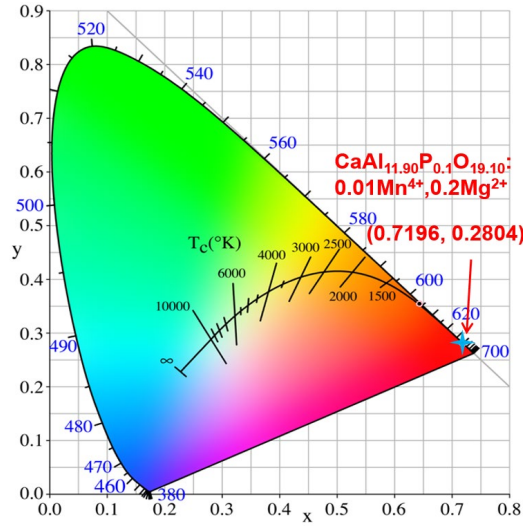

**Fig. S11** CIE chromaticity diagram of  $\text{CaAl}_{11.90}\text{P}_{0.1}\text{O}_{19.10}:\text{0.01Mn}^{4+},\text{0.2Mg}^{2+}$  phosphor.

The color purity is calculated by the following formula:<sup>5</sup>

$$\text{Color purity} = \frac{\sqrt{(x - x_i)^2 + (y - y_i)^2}}{\sqrt{(x_d - x_i)^2 + (y_d - y_i)^2}} \times 100\% \quad (6)$$

where  $(x_d, y_d)$  is the color coordinate corresponding to the dominant wavelength of the light source (0.7320, 0.2680),  $(x, y)$  is the color coordinate of  $\text{CaAl}_{11.90}\text{P}_{0.1}\text{O}_{19.10}:\text{0.01Mn}^{4+},\text{0.2Mg}^{2+}$  sample (0.7196, 0.2804),  $(x_i, y_i)$  is the standard color coordinates (0.310, 0.316) specified by the National Television Standards Committee (NTSC). Based on the above equation, the color purity of  $\text{CaAl}_{11.90}\text{P}_{0.1}\text{O}_{19.10}:\text{0.01Mn}^{4+},\text{0.2Mg}^{2+}$  phosphor is calculated to be 96.8%.

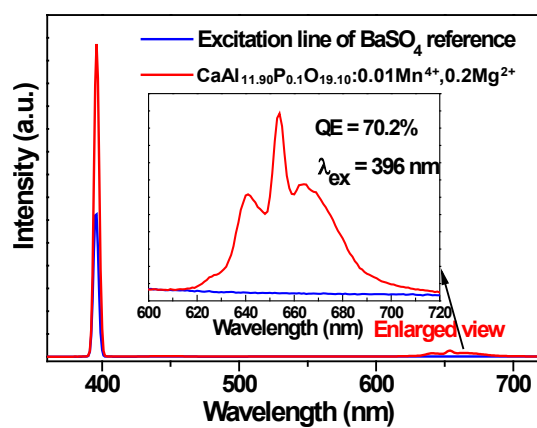

**Fig. S12** The measurement of PLQY of CaAl<sub>11.90</sub>P<sub>0.1</sub>O<sub>19.10</sub>:0.01Mn<sup>4+</sup>,0.2Mg<sup>2+</sup> phosphor, and the inset is the enlarged pattern ranging from 600 nm to 720 nm.

## **Supporting videos**

**SV1:** The substitution process of  $\text{Mn}^{4+}$ - $\text{Mg}^{2+}$  ion pairs in the crystal structure.

**SV2:** The formation of electron trap and its capture of foreign electrons.

**SV3 and SV4:** The formation of oxygen vacancy and ionic atmosphere, and their binding state of electrons.

**SV5:** The formation process of luminescence center and electron trap between the (012) crystal plane.

## References

- 1 D. L. Wood and J. Tauc, *Phys. Rev. B.*, 1972, **5**, 3144-3151.
- 2 J. Zhong, X. Chen, D. Chen, M. Liu, Y. Zhu, X. Li and Z. Ji, *J. Alloys Compd.*, 2019, **773**, 413-422.
- 3 S. Gu, M. Xia, C. Zhou, Z. Kong, M. S. Molokeev, L. Liu, W.-Y. Wong and Z. Zhou, *Chem. Eng. J.*, 2020, **396**, 125208.
- 4 J. Zhong, D. Chen, S. Yuan, M. Liu, Y. Yuan, Y. Zhu, X. Li and Z. Ji, *Inorg. Chem.*, 2018, **57**, 8978-8987.
- 5 H. Guo and X. Huang, *J. Alloys Compd.*, 2018, **764**, 809-814.
